# Supplementary material for: Slc35a1 deficiency causes thrombocytopenia due to impaired megakaryocytopoiesis and excessive platelet clearance in the liver
Source: PubMed Central journal article supplement — Haematologica. 2020 Apr 17;106(3):759–69. doi: 10.3324/haematol.2019.225987 (PMC7927894; doi:10.3324/haematol.2019.225987), 2020-04-17
Supplement: 2019_225987-Disclosures_Contributions.pdf [file 2019_225987-Disclosures_Contributions.pdf]

Haematologica  
HAEMATOL/2019/225987  
Version 5

Slc35a1 deficiency causes thrombocytopenia due to impaired megakaryocytopoiesis and excessive platelet clearance in the liver

Xiaolin Ma, Yun Li, Yuji Kondo, Huiping Shi, Jingjing Han, Yizhi Jiang, Xia Bai, Stephanie A. Archer-Hartmann, Parastoo Azadi, Changgeng Ruan, Jianxin Fu, and Lijun Xia

Collaborative Groups: Jiangsu Institute of Hematology, Soochow University, China (Changggeng Ruan)

Disclosures: This study is a collaboration between Dr. Changgeng Ruan's lab at Jiangsu Institute of Hematology (JIH), Soochow University, China, and Oklahoma Medical Research Foundation (OMRF), USA. The study was funded by JIH and OMRF. There is no intellectual conflicts of interests.

Contributions: XM, YL, YK, JH, SAA, and PA designed and conducted experiments, analyzed data, as well as drafted the manuscript. HS, YK, YJ, XB contributed to manuscript preparation. JF, CR and LX designed the study, analyzed data, and wrote the paper.
